**Olfactory modulation of flight in *Drosophila* is sensitive, selective and rapid**

Vikas Bhandawat, Gaby Maimon, Michael H. Dickinson and Rachel I. Wilson

10.1242/jeb.053546

There was an error published in *J. Exp. Biol.* **213**, 3625-3635.

In the original published version of Fig. 4C, the color code of the y-axes was inadvertently switched. The left y-axis should be red and the right y-axis should be gray. A corrected version of the figure is shown here.

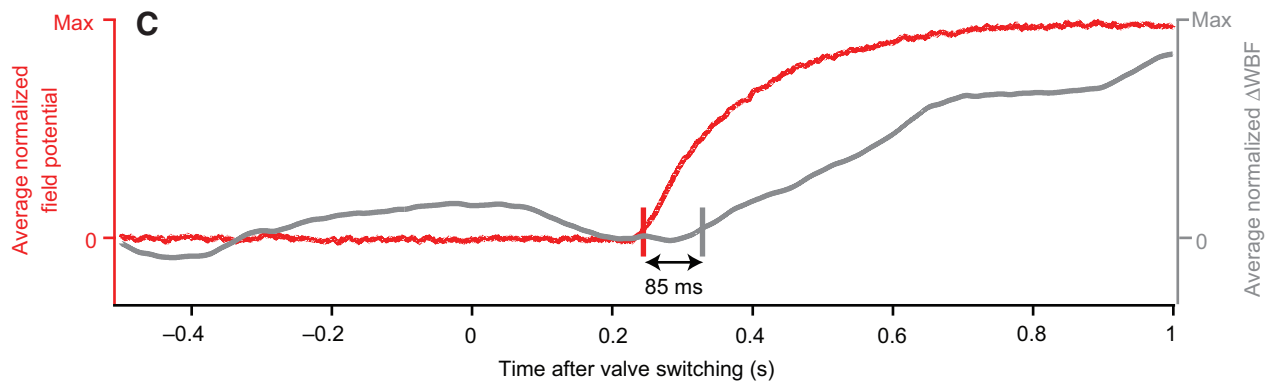

The authors apologise to readers for this error.
